# Supplementary material for: Chebulinic Acid Suppresses Adipogenesis in 3T3-L1 Preadipocytes by Inhibiting PPP1CB Activity
Source: MDPI journal article supplement (doi:10.3390/ijms23020865), 2022-01-13
Supplement: s1 [file s1]

## Supplementary Information

# Chebulinic Acid Suppresses Adipogenesis in 3T3-L1 Preadipocytes by Inhibiting PPP1CB Activity

Jinsoo Kim <sup>1,†</sup>, Dohee Ahn <sup>1,†</sup> and Sang J. Chung <sup>1,2,\*</sup>

<sup>1</sup> School of Pharmacy, Sungkyunkwan University, Suwon 16419, Korea; neto543@naver.com (J.K.); ehgml94@naver.com (D.A.)

<sup>2</sup> Department of Biopharmaceutical Convergence, Sungkyunkwan University, Suwon 16419, Korea

\* Correspondence: sjchung@skku.edu

<sup>†</sup> These authors contributed equally to this work.

## List of Contents

|                                                                                     |          |
|-------------------------------------------------------------------------------------|----------|
| <b>Figure S1. Sequence of purified PPP1CB.....</b>                                  | <b>2</b> |
| <b>Figure S2. Purified proteins according to the affinity tags.....</b>             | <b>3</b> |
| <b>Figure S3. Calibration curve of the fluorescence intensity versus DiFMU.....</b> | <b>4</b> |
| <b>Figure S4. Kinetic graph of GST-Tagged-PPP1CB.....</b>                           | <b>6</b> |
| <b>Figure S5. Kinetics graph of PPP1CB without tag.....</b>                         | <b>5</b> |
| <b>Table S1. Information of compounds inhibiting PPP1CB .....</b>                   | <b>7</b> |
| <b>Table S2. Sequences of primers.....</b>                                          | <b>8</b> |
| <b>Figure S6. Certificate of editing.....</b>                                       | <b>9</b> |

MADGELNVDSLITRLLEVRGCRPGKIVQMTEAEVRGLCIKSREIFLSQPILLELEAPLKICGDIHGQYTDLLRLFYGGFPPEANYLFLGDYVDR  
GKQSLETICLLLAYKIKYPENFFLLRGNHECASINRIYGFYDECKRRFNIKLWKTFDCFNCLPIAAIVDEKIFCCHGGLSPDLQSMEQIRRIMRPT  
DV PDTGLLCDLLWSDPKDVQGWGENDRGVSFTFGADVSKFLNRHDLICRAHQVVEDGYEFFAKRQLVTLFSAPNYCGEFDNAGGMM  
SVDETLMC SFQILKPSEKKAKYQYGGLNSGRPVTPPRTANPPKKR

**Figure S1.** Sequence of purified PPP1CB (1-266) was highlighted in Red color.

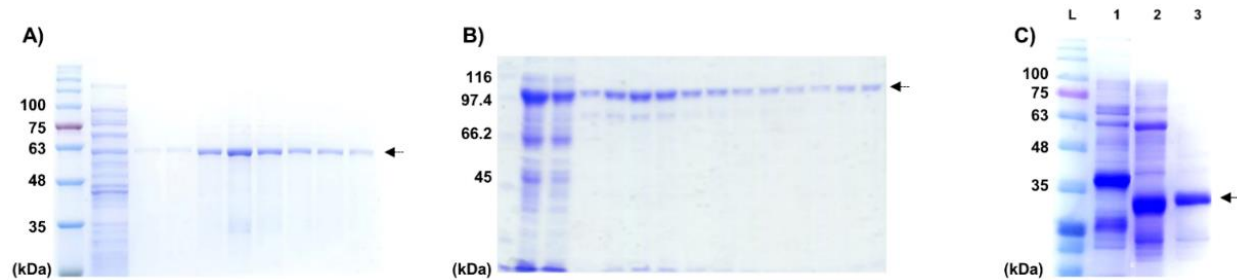

**Figure S2.** Purified proteins according to the affinity tags. (A) Glutathione-S-transferase (GST)-tagged protein phosphatase-1 catalytic subunit beta (PPP1CB) was purified using the columns packed with glutathione resins. (B) Maltose-binding protein (MBP)-tagged PPP1CB was purified using amylose resins. (C) 1 - 6xHis-tagged PPP1CB was purified using talon resins. 2 - 6xHis tag was cleaved using caspase-3. 6xHis tag and caspase-3 were eliminated using talon resins. 3 - PPP1CB without any affinity tag was subjected to further purification using Superose-6.

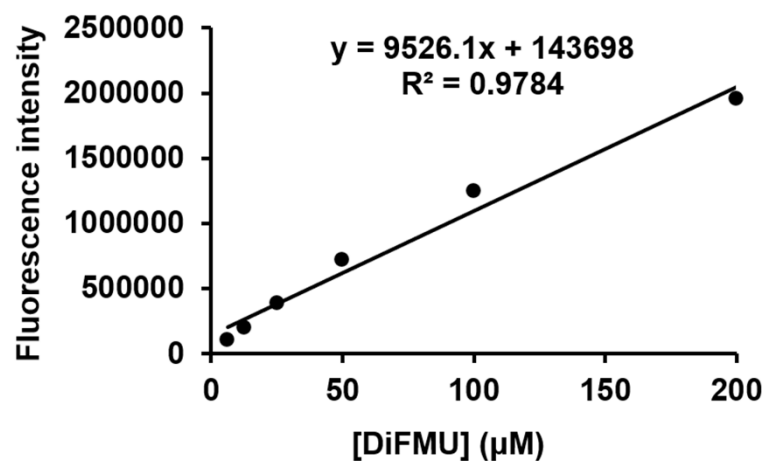

**Figure S3.** Calibration curve of the fluorescence intensity versus DiFMU from 6.25 to 200  $\mu\text{M}$ . DiFMU with various concentrations (6.25, 12.5, 25, 50, 100, 200  $\mu\text{M}$ ) in the reaction buffer (20 mM Tris pH 7.0, 150 mM NaCl, 0.01% Triton X-100, and 1 mM  $\text{MnCl}_2$ ) was detected by a Victor X4 Multilabel Plate Reader at excitation and emission wavelengths of 355 and 460 nm.

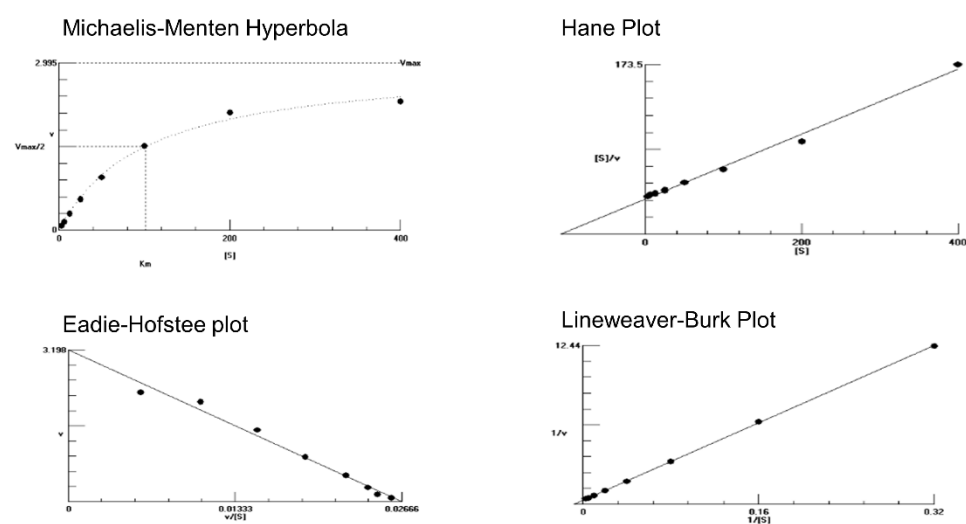

**Figure S4.** Kinetic graph of GST-Tagged-PPP1CB. Protein was added to reaction buffer containing each concentration of DifMUP (400, 200, 100, 50, 25, 12.5, 6.25, and 3.13  $\mu\text{M}$ ).

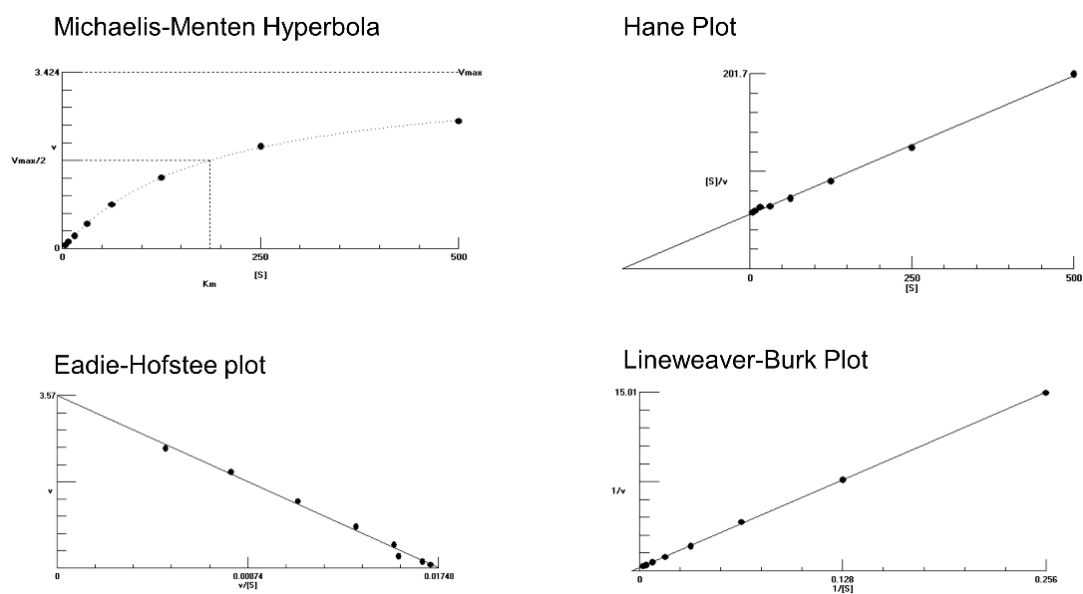

**Figure S5.** Kinetics graph of PPP1CB without tag. Protein was added to reaction buffer containing each concentration of DifMUP (500, 250, 125, 62.5, 31.25, 15.63, 7.81, and 3.91  $\mu\text{M}$ ).

**Table S1.** Information of compounds inhibiting PPP1CB.

| Compound number | Compound name                   | CAS number  |
|-----------------|---------------------------------|-------------|
| 1               | 1,2,3,4,6-o-Pentagalloylglucose | 30964-13-7  |
| 53              | Acetylshikonin                  | 24502-78-1  |
| 65              | Alpha-Boswellic acid            | 471-66-9    |
| 69              | Amentoflavone                   | 1617-53-4   |
| 100             | Baicalein                       | 491-67-8    |
| 132             | Cantharidin                     | 56-25-7     |
| 142             | Celastrol                       | 34157-83-0  |
| 146             | Chebularic acid                 | 23094-71-5  |
| 147             | Chebulinic acid                 | 18942-26-2  |
| 164             | Coptisine Chloride              | 6020-18-4   |
| 176             | Crocetin                        | 27876-94-4  |
| 177             | Crocin I                        | 42553-65-1  |
| 178             | Crocin II                       | 55750-84-0  |
| 189             | Cyanidin chloride               | 528-58-5    |
| 190             | Cyanidin-3-glucoside chloride   | 7084-24-4   |
| 235             | Ellagic Acid                    | 476-66-4    |
| 242             | Epigallocatechin gallate        | 989-51-5    |
| 261             | Fisetin                         | 528-48-3    |
| 271             | Gallic Acid Ethyl Ester         | 831-61-8    |
| 272             | Gallocatechin gallate           | 4233-96-9   |
| 284             | Geraniin                        | 60976-49-0  |
| 331             | Hypericin                       | 548-04-9    |
| 335             | Icariside I                     | 56725-99-6  |
| 340             | Irinotecan Hydrochloride        | 100286-90-6 |
| 362             | Juglone                         | 481-39-0    |
| 410             | Medicagenic acid                | 599-07-5    |
| 428             | Myricetin                       | 529-44-2    |
| 429             | Myricetrin                      | 17912-87-7  |
| 471             | Palmitine Chloride              | 10605-02-4  |
| 526             | Punicalagin                     | 65995-63-3  |
| 527             | Punicalin                       | 65995-64-4  |
| 528             | Purpurin                        | 81-54-9     |
| 531             | Quercetin 7-rhamnoside          | 22007-72-3  |
| 558             | Salvianolic acid C              | 115841-09-3 |
| 574             | Scopoletin                      | 92-61-5     |
| 576             | Scutellarein                    | 529-53-3    |
| 582             | Sennoside A                     | 81-27-6     |
| 583             | Sennoside B                     | 128-57-4    |
| 670             | Ligustilide                     | 81944-09-4  |
| 721             | Sulforaphene                    | 592-95-0    |
| 750             | Dimethoxylapigenin              | 5128-44-9   |
| 991             | Epiberberine                    | 6873-09-2   |
| 1044            | Luteolin                        | 491-70-3    |
| 1053            | Norcantharidin                  | 29745-04-8  |
| 1088            | Soyasaponin Ba                  | 114590-20-4 |

**Table S2.** Sequences of primers.

| <b>Gene</b>                           | <b>Forward (5'-3')</b> | <b>Reverse (5'-3')</b> |
|---------------------------------------|------------------------|------------------------|
| Mouse <i>PPAR<math>\gamma</math></i>  | AGGGCGATCTTGACAGGAAA   | GATCGAAACTGGCACCCCTTG  |
| Mouse <i>C/EBP<math>\alpha</math></i> | GTGGACAAGAACAGCAACGAG  | TTGACCAAGGAGCTCTCAGG   |
| Mouse <i>FAS</i>                      | GCTGCGGAAACTTCAGGAAA   | GAGTTGAGCTGGGTTAGGGT   |
| Mouse <i>SCD</i>                      | CGAGAGAAGGTGAAGACGGT   | TAGAGCTTGCAGGAGGGAAC   |



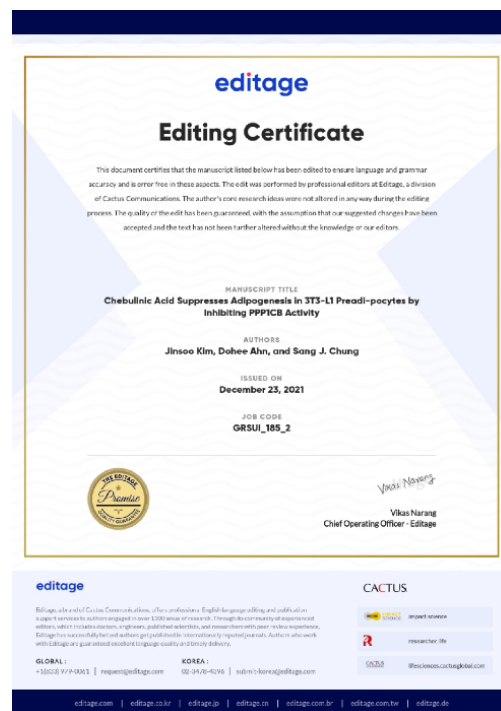

Figure S6. Certificate of editing.
